# Supplementary material
Source: PubMed Central journal article supplement (PMC8078121)
Supplement: str-52-1895-s001.pdf [file str-52-1895-s001.pdf]

## **SUPPLEMENTAL MATERIAL**

**Table I: Summary of literature describing the incidence of stroke amongst COVID-19 patients.**

| <b>Reference</b>               | <b>Country</b>             | <b>Types of Stroke</b>                                      | <b>Incidence/Age</b>    |
|--------------------------------|----------------------------|-------------------------------------------------------------|-------------------------|
| Yaghi et al <sup>15</sup>      | USA                        | Large and small vessel occlusion                            | 0.9%/ Median=62.5 years |
| Mao et al <sup>6</sup>         | China                      | Ischemic stroke and cerebral haemorrhage                    | 5.7%/ Mean= 52.7 years  |
| Jain et al <sup>86</sup>       | USA                        | Large/small vessel occlusion, ICH and hypoxic               | 1.1%/ Median=66 years   |
| Klok et al <sup>14</sup>       | Netherlands                | Ischaemic stroke (site not defined)                         | 2.7%/ Mean= 64 years    |
| Khandelwal et al <sup>87</sup> | USA, Spain and Italy       | Large vessel occlusion                                      | 1.3%/ Mean =51 years    |
| Bach et al <sup>12</sup>       | USA                        | Large-vessel occlusion and high-grade large-vessel stenosis | 2.9%/ Mean = 63 years   |
| Li et al <sup>88</sup>         | China                      | Large/small vessel occlusion and ICH                        | 4.6%/ 57-91 years       |
| Siegler et al <sup>89</sup>    | USA, Spain, Egypt, Romania | Large/small vessel occlusion and ICH                        | 1.13%/ 60-79 years      |
| Richter et al <sup>90</sup>    | Germany                    | Not defined                                                 | 1.2%/ Mean= 76.1 years  |
| Lodigiani et al <sup>91</sup>  | Italy                      | Ischaemic stroke (site not defined)                         | 2.5%/ Median =66 years  |
| Fridman et al <sup>5</sup>     | Canada, USA, and Iran      | Large/small vessel occlusion                                | 1.8%/ N.A               |
| Kvernland et al <sup>92</sup>  | USA                        | ICH                                                         | 0.5%/ Median= 60 years  |
| Merkler et al <sup>93</sup>    | USA                        | Ischaemic stroke (site not defined)                         | 1.6%/ Median =69 years  |
| Modin et al <sup>94</sup>      | Denmark                    | Ischaemic stroke (site not defined)                         | 0.86%/ Mean= 77 years   |
